# Supplementary material
Source: PubMed Central journal article supplement (PMC2830831)
Supplement: ddp571_1.pdf [file ddp571_1.pdf]

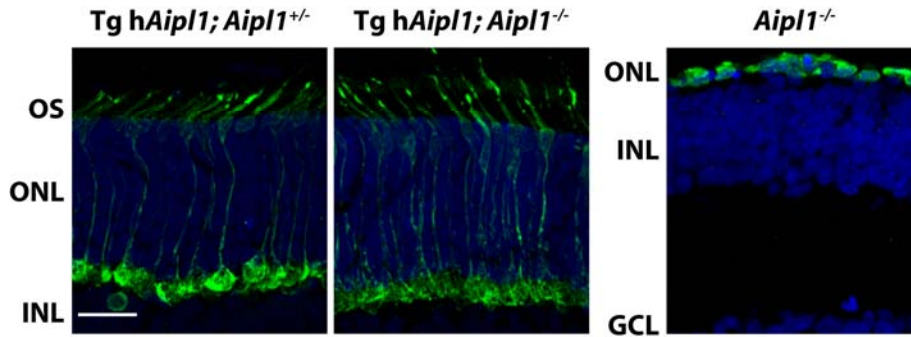

**Supplemental Figure 1.** Normal cone number and morphology in mice lacking AIPL1 exclusively in cones at post-natal day 18. Immunolocalization of cone arrestin (green) shows no appreciable difference in cone number or morphology between *tg hAipl1; Aipl1<sup>+/-</sup>* and *tg hAipl1; Aipl1<sup>-/-</sup>*. The absence of significant cone degeneration in *tg hAipl1; Aipl1<sup>-/-</sup>* retina is clearly illustrated by a comparison with *Aipl1<sup>-/-</sup>* retina, which lack cone outer segment (OS) staining and accumulate cone arrestin around the remaining single layer of cone nuclei (blue). ONL, outer nuclear layer, INL, inner nuclear layer, GCL, ganglion cell layer. Scale bar, 20  $\mu$ m.
